# Supplementary material
Source: publisher site journal article supplement (https://www.dovepress.com/article/575757)
Supplement: Supplementary file 1 [file 575757%20Revised%20Supplementary%20Materials.docx]

Supplementary Table 1 Primer sequences used for genotyping the ACE

| Gene | Primer | Primer sequence (5’🡪3’) | Product size (bp) |
| --- | --- | --- | --- |
| ACE | ACE-F | 5’-ACTCTGTAAGCCACTGCTGG-3’ | 206 bp |
| ACE-R | 5’-GATGTGGCCATCACATTCGTCAGAT-3’ |

Supplementary Table 2 Primer sequences used for genotyping the ACE I/D polymorphisms

| **Primer** | **Primer sequence (5’ 🡪 3’)** | **Product size (bp)** |
| --- | --- | --- |
| ACE-F | 5’-ACTCTGTAAGCCACTGCTGG-3’ | DD variant: 206 bp  II variant: 510 bp  ID variant: 206 and 510 bp |
| ACE-R | 5’-GATGTGGCCATCACATTCGTCAGAT-3’ |


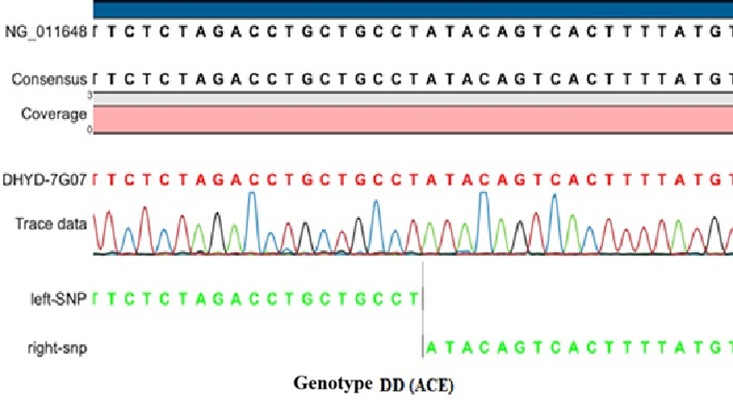


Supplementary Figure 1 Sanger sequencing chromatogram confirming the ACE DD genotype (deletion/deletion)


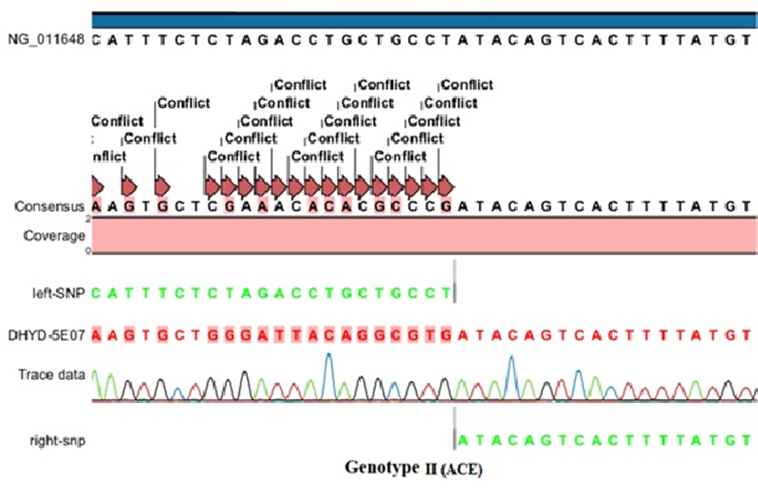


Supplementary Figure 2 Sanger sequencing chromatogram confirming the ACE II genotype (insertion/insertion)


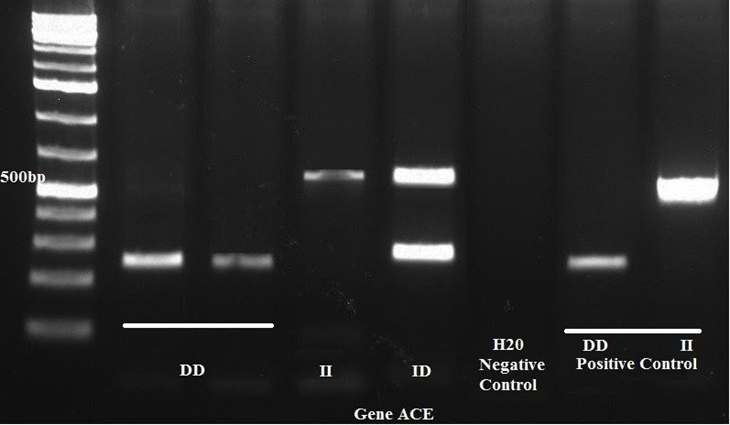


Supplementary Figure 3 Agarose gel electrophoresis of PCR products showing ACE I/D genotypes (DD, ID, and II)
